# Supplementary material for: Epigallocatechin-3-gallate protects sepsis‐induced myocardial dysfunction by inhibiting the nuclear factor-κB signaling pathway
Source: PubMed Central journal article supplement — Heliyon. 2024 Feb 27;10(5):e27163. doi: 10.1016/j.heliyon.2024.e27163 (PMC10915574; doi:10.1016/j.heliyon.2024.e27163), 2024-02-27

# Supplementary materials

Supplementary Figure 1. The original western blot bands of Fig.2E

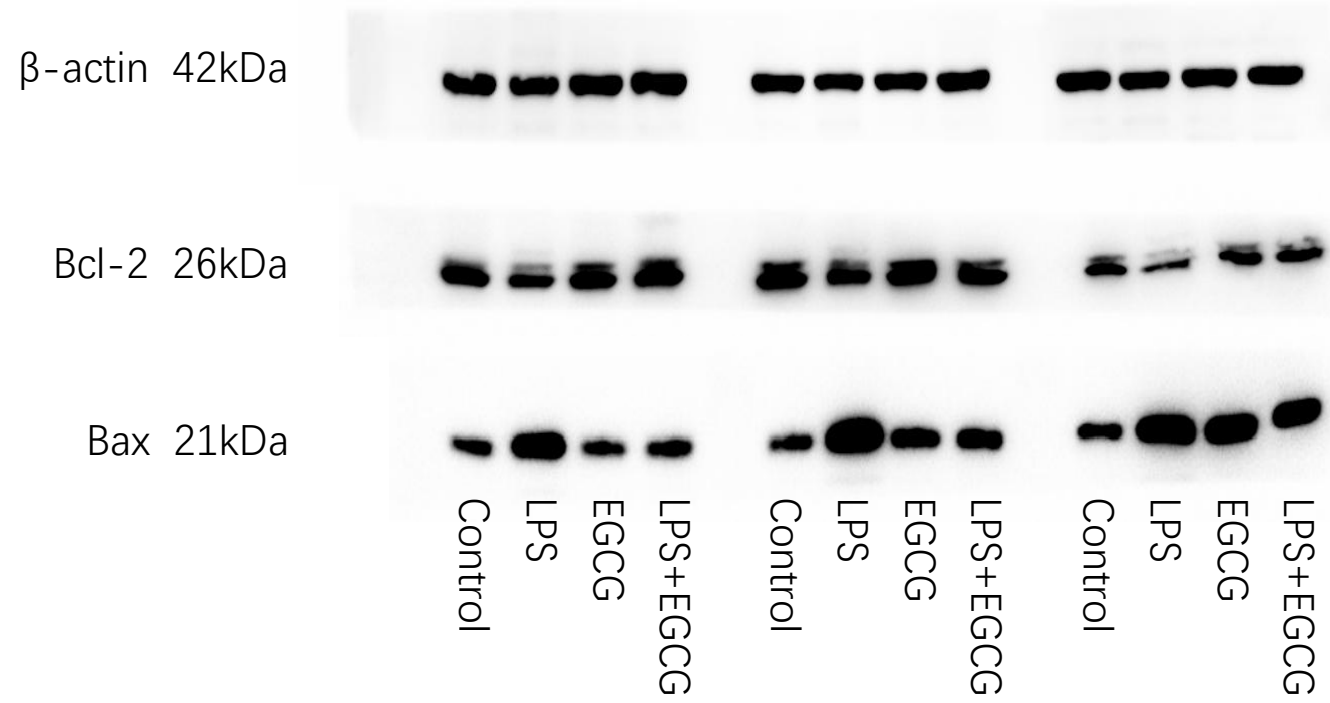

Supplementary Figure 2. The original western blot bands of Fig.3A, 3B and 3C.

Fig.3A

$\beta$ -actin 42kDa

IL-6 33kDa

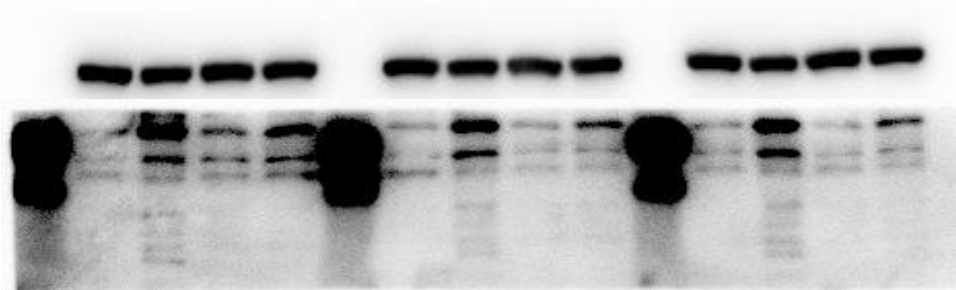

Fig.3B

$\beta$ -actin 42kDa

TNF- $\alpha$  23kDa

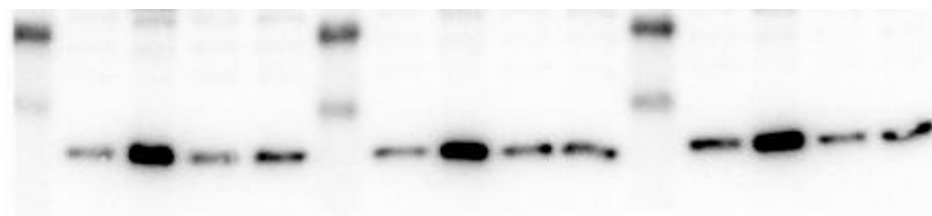

Fig.3C

$\beta$ -actin 42kDa

IL-1 $\beta$  35kDa

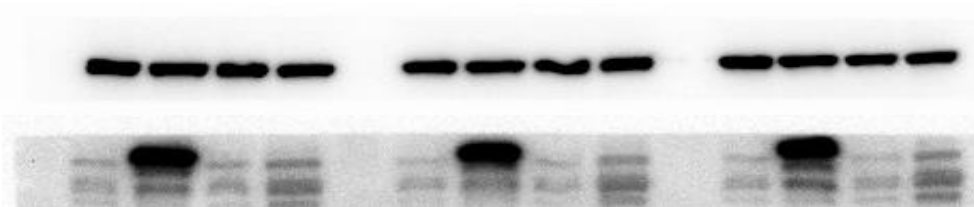

Control

LPS

EGCG

LPS+EGCG

Control

LPS

EGCG

LPS+EGCG

Control

LPS

EGCG

LPS+EGCG

Supplementary Figure 3. The original western blot bands of Fig.4C.

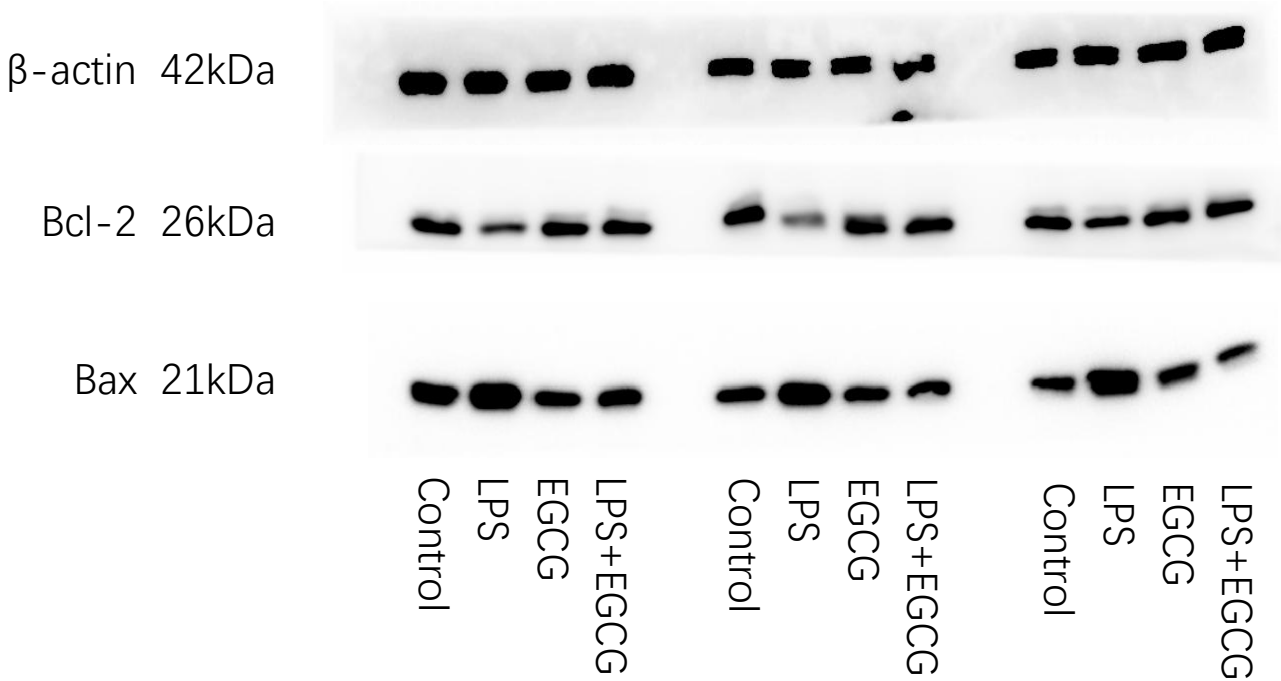

Supplementary Figure 4. The original western blot bands of Fig.5A, 5B and 5C.

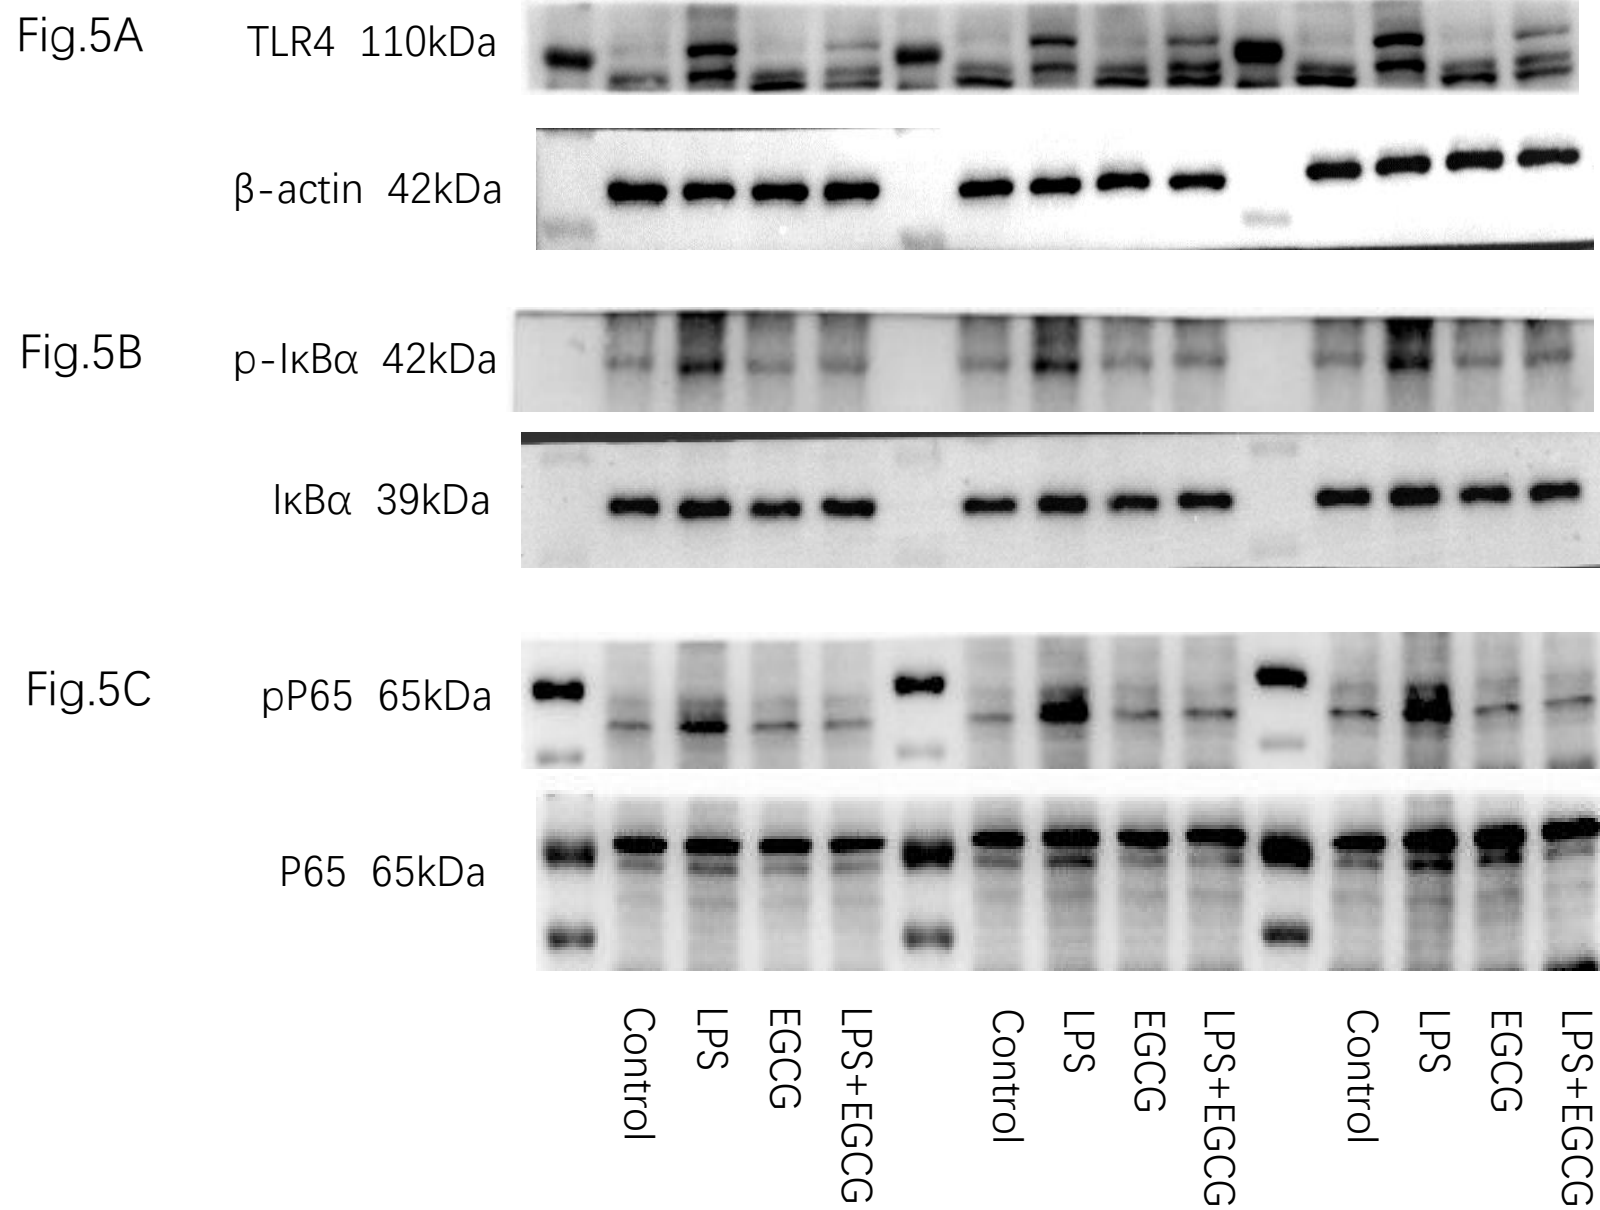

Supplement: mmc1.pdf [file mmc1.pdf]
